# Supplementary material for: Impact of Decreased Night Work on Workers’ Musculoskeletal Symptoms: A Quasi-Experimental Intervention Study
Source: Int J Environ Res Public Health. 2020 Dec 5;17(23):9092. doi: 10.3390/ijerph17239092 (PMC7730522; doi:10.3390/ijerph17239092)
Supplement: Supplementary file 1 [file ijerph-17-09092-s001.zip › Supplementary Table S1.pdf]

**Supplementary Table S1.** Change of work schedule by treated and control group.

|                             | Before (2010) |           |          | After (2013)  |           |          |
|-----------------------------|---------------|-----------|----------|---------------|-----------|----------|
|                             | Time          | Hours     | Activity | Time          | Hours     | Activity |
| Treated (shift workers)     |               |           |          |               |           |          |
| Day shift                   | 08:30 - 10:15 | 1hr 45min | Work     | 08:00 - 10:00 | 2hr       | Work     |
|                             | 10:15 - 10:30 | 15min     | Break    | 10:00 - 10:10 | 10min     | Break    |
|                             | 10:30 - 12:30 | 2hr       | Work     | 10:10 - 12:00 | 1hr 50min | Work     |
|                             | 12:30 - 13:20 | 50min     | Break    | 12:00 - 12:40 | 40min     | Break    |
|                             | 13:20 - 15:15 | 1hr 55min | Work     | 12:40 - 14:30 | 1hr 50min | Work     |
|                             | 15:15 - 15:30 | 15min     | Break    | 14:30 - 14:40 | 10min     | Break    |
|                             | 15:30 - 17:20 | 1hr 50min | Work     | 14:40 - 16:00 | 1hr 20min | Work     |
|                             | 17:20 - 17:30 | 10min     | Break    |               |           |          |
|                             | 17:30 - 19:30 | 2hr       | Work*    |               |           |          |
| Night/Evening shift         | working hour  | 9hr 30min |          | working hour  | 7hr       |          |
|                             | 19:30 - 21:45 | 2hr 15min | Work     | 16:00 - 18:00 | 2hr       | Work     |
|                             | 21:45 - 22:00 | 15min     | Break    | 18:00 - 18:40 | 40min     | Break    |
|                             | 22:00 - 24:00 | 2hr       | Work     | 18:40 - 20:30 | 1hr 50min | Work     |
|                             | 24:00 - 00:50 | 50min     | Break    | 20:30 - 20:40 | 10min     | Break    |
|                             | 00:50 - 02:45 | 1hr 55min | Work     | 20:40 - 22:30 | 1hr 50min | Work     |
|                             | 02:45 - 03:00 | 15min     | Break    | 22:30 - 22:40 | 10min     | Break    |
|                             | 03:00 - 04:20 | 1hr 20min | Work     | 22:40 - 24:00 | 1hr 20min | Work     |
|                             | 04:20 - 06:20 | 2hr       | Work*    |               |           |          |
| Control (non-shift workers) | working hour  | 9hr 30min |          | working hour  | 7hr       |          |
|                             | 08:30 - 10:15 | 1hr 45min | Work     | 08:00 - 10:00 | 2hr       | Work     |
|                             | 10:15 - 10:30 | 15min     | Break    | 10:00 - 10:10 | 10min     | Break    |
|                             | 10:30 - 12:30 | 2hr       | Work     | 10:10 - 12:00 | 1hr 50min | Work     |
|                             | 12:30 - 13:20 | 50min     | Break    | 12:00 - 12:40 | 40min     | Break    |
|                             | 13:20 - 15:15 | 1hr 55min | Work     | 12:40 - 14:30 | 1hr 50min | Work     |
|                             | 15:15 - 15:30 | 15min     | Break    | 14:30 - 14:40 | 10min     | Break    |
|                             | 15:30 - 17:20 | 1hr 50min | Work     | 14:40 - 16:00 | 1hr 20min | Work     |
|                             | 17:20 - 17:30 | 10min     | Break    |               |           |          |
|                             | 17:30 - 19:30 | 2hr       | Work*    |               |           |          |
|                             | working hour  | 9hr 30min |          | working hour  | 7hr       |          |

\* mandatory overtime.
